# 1           **Local association of *Trypanosoma cruzi* chronic infection foci and enteric** 2                           **neuropathic lesions at the tissue micro-domain scale**

3  
4 Archie A. Khan<sup>1</sup>, Harry C. Langston<sup>1</sup>, Fernanda C. Costa<sup>1</sup>, Francisco Olmo<sup>1</sup>, Martin C. Taylor<sup>1</sup>,  
5 Conor J. McCann<sup>2</sup>, John M. Kelly<sup>1</sup>, Michael D. Lewis<sup>1\*</sup>

6  
7 <sup>1</sup>Department of Infection Biology, London School of Hygiene and Tropical Medicine, Keppel Street, London,  
8 WC1E 7HT, U.K.

9  
10 <sup>2</sup>Stem Cells and Regenerative Medicine, University College London, Great Ormond Street Institute of Child  
11 Health, London, UK

## 12 13 14 **Abstract**

15  
16 Gastrointestinal (GI) disease affects a substantial subset of chronic Chagas disease (CD) patients, but  
17 the mechanism of pathogenesis is poorly understood. The lack of a robust, predictive animal model  
18 of chronic *T. cruzi* infection that exhibits functional digestive disease has held back research. To  
19 address this, we combined GI tracer assays and bioluminescence *in vivo* infection imaging systems for  
20 diverse parasite strains to discover models exhibiting chronic digestive transit dysfunction. We  
21 identified the colon as a specific site of both tissue parasite persistence and delayed transit. Digestive  
22 CD mice exhibited significant retention of faeces in both sated and fasted conditions. Histological and  
23 immunofluorescence analysis of the enteric nervous system (ENS) revealed a dramatic reduction in  
24 the number of neurons and a loss of immunoreactivity of the enteric neural network in the colon.  
25 This model therefore recapitulates key clinical manifestations of human digestive CD. We also  
26 exploited dual bioluminescent-fluorescent parasites to analyse rare chronic infection foci in the colon  
27 at the single cell level, revealing co-localisation with ENS lesions. This indicates that long-term *T.*  
28 *cruzi*-host interactions in the colon drive pathogenesis and thus chronic disease may be preventable  
29 using anti-parasitic chemotherapy.

30

31

## 32 Introduction

33

34 Chagas disease (CD) is caused by infection with the protozoan parasite *Trypanosoma cruzi*, which  
35 affects approximately 6 million people. There are two principal forms of CD, cardiac and digestive.  
36 The most prevalent cardiac presentations include myocarditis, fibrosis, arrhythmias, microvascular  
37 abnormalities, progressive heart failure and sudden death <sup>1</sup>. Cardiac CD has been the subject of  
38 intensive experimental research and many predictive animal models are available to support  
39 translation into the clinic. Human digestive CD (DCD) is characterised by progressive dilatation and  
40 dysfunction of sections of the GI tract <sup>2,3</sup>. Symptoms include achalasia, abdominal pain, constipation  
41 and faecaloma. Eventually, massive organ dilatation results in megasyndromes, usually of the colon  
42 or oesophagus. Dilatation is associated with loss of enteric neurons leading to peristaltic paralysis  
43 and smooth muscle hypertrophy. Treatments are limited to dietary and surgical interventions. The  
44 lack of a robust small animal model of enteric CD has been a major block on basic and translational  
45 research.

46

47 Of symptomatic CD patients, ~65% have cardiomyopathy, 30% enteropathy and 5% have both, with  
48 digestive disease most common in Bolivia, Chile, Argentina and Brazil <sup>1</sup>. Anti-parasitic chemotherapy  
49 has not been considered justifiable for *T. cruzi*-positive individuals with digestive symptoms but  
50 normal heart function <sup>4</sup>. The primary reason is that no clinical trials have addressed treatment  
51 efficacy in the context of digestive outcomes, and there are little to no experimental data on which to  
52 base such trials. Molecular and cellular explanations of DCD pathogenesis also lag far behind the  
53 advances made for Chagas cardiomyopathy.

54

55 The lack of progress in developing treatments for DCD is also connected to the prevailing view that  
56 megasyndromes result from irreversible enteric denervation, specifically during the *acute* phase of  
57 infection <sup>5,6</sup>, in which anti-parasitic inflammatory responses are thought to cause iNOS-dependent  
58 collateral damage to neurons, leading to aganglionosis <sup>5,7</sup>. Further age-related nerve degeneration is  
59 posited to gradually unmask these parasite-driven losses, leading to progressive organ dysfunction  
60 on a timescale of years to decades <sup>5</sup>. Recently, several lines of evidence have converged to question  
61 this theory. Experimental infection imaging studies in mice revealed that GI tract is in fact a long-  
62 term reservoir of *T. cruzi* infection <sup>8,9</sup>. Adult enteric neurogenesis has been described in response to  
63 chemically-mediated tissue injury <sup>10</sup> and in the steady state <sup>11</sup>. A series of advances has also  
64 highlighted previously unappreciated levels of interconnectedness between the gut's immune and  
65 nervous systems <sup>12-14</sup>. We therefore hypothesized that host-parasite interactions in the chronically

66 infected gut might impact continuously on the enteric nervous system (ENS) and musculature to  
67 drive DCD pathogenesis.

68

69 Here, we screened a series of parasite and mouse strain combinations to identify several models  
70 with significant digestive motility dysfunction. Using a combination of bioluminescence and  
71 fluorescence *in vivo* and *ex vivo* imaging techniques we demonstrate that chronic *T. cruzi* persistence,  
72 gut motility delay and enteric neuronal damage are co-localised within discrete foci in the colonic  
73 muscularis. This indicates that DCD tissue pathology and transit dysfunction are likely driven by *T.*  
74 *cruzi* persistence in the colon and the associated chronic inflammatory response. DCD should  
75 therefore be considered as potentially preventable by anti-parasitic chemotherapy. It also opens the  
76 way to investigate the molecular and cellular basis of pathogenesis and *T. cruzi* immune evasion.

77

## 78 **Results**

79

### 80 **Screening *T. cruzi* mouse infection models for delayed digestive transit times**

81

82 We previously developed a series of mouse models of *T. cruzi* infection based on parasites  
83 transgenically expressing the luciferase variant *PpyRE9h*, which serves as an orange-red light emitting  
84 *in vivo* reporter protein<sup>15</sup>. Host-parasite combinations of BALB/c and C3H/HeN mice and TcVI-CL  
85 Brener (CLBR) and TcI-JR strain parasites permit long-term tracking of the course and distribution of  
86 infections in individual animals (Figure 1a). These models, which exhibit a spectrum of Chagas heart  
87 disease severities<sup>9</sup>, were selected to screen for gastrointestinal (GI) transit time delays, a common  
88 feature of DCD, by oral feeding of a red dye tracer (carmines). Three of the four host-parasite  
89 combinations took significantly longer than control uninfected mice to pass the tracer at acute  
90 phase, 3 weeks post-infection (p.i.), and/or at 6 weeks p.i. transition phase (Figure 1b). During the  
91 early chronic phase, 12 and 18 weeks p.i., only the TcI-JR-infected C3H mice displayed the delay  
92 phenotype, which became markedly more severe as the infection developed into the later chronic  
93 phase at 24 and 30 weeks p.i. Milder, but still significant transit delay phenotypes also emerged in  
94 the other three models.

95

96 *T. cruzi* as a species encompasses a high level of genetic diversity structured across six major lineages  
97<sup>16-18</sup>. To test whether and at what level the strong digestive transit delay phenotype in C3H mice was  
98 conserved, we tested a further nine *T. cruzi* strains from five lineages (4x TcI, 1x TcII, 1x TcIII, 1x TcIV  
99 and 1x TcVI) using the carmine transit assay (Supplementary Figure 1). Two more strains were

100 identified showing evidence of delayed transit: TcI-SN3 and TcVI-Peru. This type of pathology is  
101 therefore a relatively rare, strain-specific trait in *T. cruzi*. It occurs in both TcI and TcVI strains, but is  
102 not conserved within lineages.

103

#### 104 **Parasite persistence within the GI tract**

105

106 We selected the TcI-JR-infected C3H mouse as the most suitable model of experimental chronic DCD.  
107 The transit time delay in these animals (Figure 1b) did not show a correlation with the overall  
108 parasite burden, which dropped by approximately two orders of magnitude from the acute peak to  
109 the level seen in the chronic phase (Figure 1a). Much of the bioluminescence signal in whole animal  
110 imaging derives from parasites in the skin<sup>8,9</sup>, so we quantified organ-specific parasite loads using *ex*  
111 *vivo* imaging at 3, 6 and 30 weeks p.i. (Figure 2a). Parasitism was consistently detected in the GI tract,  
112 in foci distributed from the stomach to the rectum, being relatively more intense in the stomach and  
113 large intestine compared to the small intestine (Figure 2a, 2b). All sites exhibited significantly lower  
114 parasite loads in the chronic than acute phase (Figure 2b). Thus, GI transit delays were associated  
115 with local persistence of *T. cruzi*. There was a positive correlation between endpoint GI parasite loads  
116 and the severity of transit delay during the acute phase (3 weeks p.i.), but there were no such  
117 quantitative associations in the transition (6 weeks) or chronic (30 weeks) phases (Figure 2c).

118

#### 119 **Regional dissection of the transit delay phenotype reveals localisation to the colon**

120

121 The transit time delay seen in infected animals was not explained by differences in body weight or  
122 intestine length (Supplementary Figure 2). This suggested a functional impairment to peristalsis, as  
123 seen in human DCD. Our next aim was to determine the digestive tract region(s) in which the transit  
124 time delay was localised. To do this we fed mice with red and green fluorescent tracers (Rhodamine  
125 dextran and 70kDa FITC dextran, respectively) at variable time intervals prior to *ex vivo* imaging. An  
126 interval of 5 minutes was used to test whether stomach emptying was delayed. No significant  
127 differences were detected in infected animals compared to controls (Figure 3a), either at 6 or 30  
128 weeks p.i. There was a significant difference in stomach weight at 6 weeks p.i. (Figure 3b), which may  
129 indicate increased retention of matter more solid than the tracer.

130

131 To measure small intestine dysfunction, we initially analysed tracer transit after 45 minutes and  
132 observed a trend for delay in infected mice during the acute but not the chronic phase (Figure 3c). At  
133 3 weeks p.i. there was also significantly increased organ weight (Figure 3d), so we extended analysis

134 at this time point using an increased parasite inoculum and extended the tracer interval time to 60  
135 minutes. Here we observed evidence of significant small intestine transit delay (Figure 3e).

136

137 We next assessed colonic transit using a 90 minute interval after the fluorescent tracer feed.

138 Fluorescence transit appeared similar in infected and control mice at 3 and 6 weeks p.i. (Figure 4a).

139 Unlike the timings used to study transit delay in the upper intestinal tract (Figure 3), the method was

140 less reliable to study the colon in isolation because substantial amounts of dye were still present in

141 the small intestine and we could not quantify any dye that was excreted. Nevertheless, large

142 intestine weights were significantly increased in infected mice at 6 and 30 weeks p.i. (Figure 4b)

143 suggesting a site-specific dysfunction. We therefore employed an alternative assay in which mice

144 were fasted for 4 hr prior to analysis of colon lumen contents. *T. cruzi* infected colons showed

145 significantly greater retention of faeces than controls as shown by pellet counts and both wet and

146 dry total faecal weights, ruling out altered water absorption as an explanation (Figure 4c). The colon-

147 localised transit delay phenotype was highly significant at 6 weeks p.i. and endured into the chronic

148 phase, at 30 weeks p.i. (Figure 4c). By varying the fasting time (0, 2 and 4 hr) we showed that this

149 phenotype was maintained irrespective of stomach fullness and showed distal colon faecal impaction

150 developing in *T. cruzi* infected mice within this timeframe (Figure 4d). The other *T. cruzi* strains

151 exhibiting signs of total GI transit delay in the carmine assay (SN3, Peru, CLBR) also showed

152 significant retention of faeces after 4 hr fasting, whereas strains with normal carmine transit times

153 did not (Supplementary Figure 4). Thus, when GI transit dysfunction occurs in murine chronic *T. cruzi*

154 infections it is predominantly localised to the colon.

155

156 To further investigate whether the observed functional constipation phenotype was accompanied by

157 alterations at the molecular level, we used RT-qPCR to measure transcript abundance for 12 neuronal

158 and inflammatory response genes in colon tissue from chronically infected mice (Figure 4e). Neuron-

159 specific tubulin  $\beta$ -3 (*Tubb3*) and neuronal nitric oxide synthase (*Nos1*) genes were strongly

160 downregulated by ~75% compared to naïve control mice. Expression of excitatory substance P and

161 inhibitory vasoactive intestinal peptide (*Vip*) ENS neurotransmitters was also decreased, but to a

162 lesser extent. No evidence of altered transcript abundance was found for markers of other enteric

163 neuronal subtypes, tyrosine hydroxylase (*Th*) and acetylcholine (*Chat*), tropomyosin receptor kinases

164 (*Ntrk1/2/3*) or nerve growth factor (*Ngfr*). Taken together, these data indicate a possible

165 downregulation of the enteric nitrergic transmission associated with GI dysfunction in DCD mice,

166 recapitulating observations in human Chagas megasyndromes as well as other enteric neuropathies

167 <sup>19-23</sup>.

168

169 **Chronic infection foci and enteric neuronal damage at organ and tissue micro-domain scales**

170

171 Our next aim was to investigate disease pathogenesis in this model and commonalities with human  
172 DCD. Colon tissue from TcI-JR chronically infected mice (> 210 days p.i.) contained significant  
173 lymphocytic inflammatory infiltrates that were diffusely and focally distributed in the smooth muscle  
174 layers (Figure 5a). Immunohistochemical labelling of the nerve plexuses within the muscle layers  
175 showed that the total amount of neuron-specific tubulin (TuJ1) protein within myenteric ganglia was  
176 lower on average in infected mice, but this was not statistically significant (Figure 5b). However, there  
177 was a conspicuous spatial disorganisation of TuJ1 in a subset of ganglia, associated with the  
178 appearance of anomalous internal acellular structures in these ganglia, which were refractory to  
179 common histological dyes (Figure 5b, Supplementary Figure 5). To investigate this with greater  
180 precision, we used whole mount immunofluorescence analysis of the neuronal cell body marker  
181 HuC/D. This revealed a dramatic loss of neurons across the proximal, mid and distal colon myenteric  
182 plexus (Figure 5c, 5d). This was not a product of a reduced number of ganglia (Figure 5e), rather a  
183 highly significant reduction in neurons per ganglion (Figure 5f).

184

185 A critical question for rational design of therapies for DCD is whether *T. cruzi* and the associated host  
186 response continues to drive ENS pathology during the chronic phase of infection. At this stage, very  
187 few colon cells are infected at any one time and parasite foci are spatiotemporally dynamic, with an  
188 intracellular lytic cycle lasting 1-2 weeks before motile trypomastigotes migrate within and between  
189 tissues<sup>24</sup>. Thus, any temporal association between infection and ENS damage is likely highly localised  
190 and rare at any snapshot in time. Indeed, there was no correlation between chronic endpoint  
191 parasite loads in colon regions and the level of local denervation (Figure 6a). We also observed both  
192 denervated and intact myenteric ganglia immediately adjacent to each other (Figure 6b). Using dual  
193 bioluminescent-fluorescent reporter parasites<sup>25</sup> we were able to visualise rare chronic infection foci  
194 at single cell resolution. In most cases, infected cells were early in the proliferative cycle, with 10-50  
195 amastigote forms, and they were located in close proximity to intact enteric nerve fibres (Figure 6c,  
196 Supplementary Figure 6). We also captured a very rare, mature pseudocyst at the point of rupture,  
197 with thousands of intracellular parasites and trypomastigote forms escaping the site (Figure 6d). The  
198 ENS at the level of this pseudocyst was almost completely ablated, whereas the overlying and  
199 laterally adjacent ENS networks were intact (Figure 6e). Taken together, our data demonstrate there  
200 is an enduring association, at a highly localised tissue micro-domain scale, between chronic  
201 parasitism of the gut wall and ENS lesions.

202

## 203 **Discussion**

204

205 Understanding of the mechanism of DCD pathogenesis remains rudimentary and a lack of  
206 experimental tools hampers progress. Post-mortem and biopsy studies of human DCD cases found  
207 reduced numbers of enteric neurons and glial cells<sup>26-28</sup>. These are important insights into late and  
208 terminal disease states, but they provide limited information on pathogenesis and relationships with  
209 infection load or distribution. *T. cruzi* infected mice do not develop digestive megasyndromes, but  
210 these are late stage manifestations of human disease, and usually take many years to develop.  
211 Nevertheless, denervation and other features of nascent enteropathy have been described in mouse  
212 models at the histological level<sup>14,29-32</sup>. Delayed transit has also been reported<sup>33,34</sup> but neither the GI  
213 region involved nor associations with infection dynamics were determined. In this study, we present  
214 new experimental chronic *T. cruzi* infection models that, crucially, feature co-localised parasite  
215 persistence, enteric denervation and delayed transit as a key functional symptom of DCD. This will  
216 now enable pre-clinical drug development to focus on this form of CD, supported by an ability to  
217 undertake longitudinal monitoring of individual animal parasite loads using bioluminescence  
218 imaging.

219

220 In keeping with human disease epidemiology<sup>35</sup>, our data show that both host and parasite genetics  
221 contribute to murine DCD susceptibility. The digestive tract in mice is a universal reservoir of chronic  
222 infection, but only a few *T. cruzi* strains caused transit dysfunction within the timeframe of these  
223 experiments. Disease severity was also higher in C3H/HeN than BALB/c mice, a finding previously  
224 observed for murine cardiac CD<sup>9</sup>, and is consistent with the heterogeneous clinical outcomes  
225 observed in humans<sup>36</sup>. Thus, gut parasitism alone is not sufficient as an explanation for DCD  
226 development. Investigation of parasite virulence and variability in the host immune response will be  
227 required to gain further insight into the determinants of susceptibility and resistance.

228

229 Our results challenge the prevailing theory that DCD is a result of collateral damage to the ENS,  
230 resulting specifically from the acute inflammatory response against *T. cruzi*<sup>5,37</sup>. This idea was rooted  
231 in an inability to detect gut-localised parasites in chronic infections, which has only recently been  
232 overcome by the development of highly sensitive bioluminescence imaging methods<sup>8,9</sup>. By  
233 combining live parasite imaging and gut tracer analyses, we found enduring associations between  
234 infection of the colon and local transit impairment at >6 months post-infection, and moreover at the  
235 tissue micro-domain scale between single infected cells and ENS lesions. Treatment of human

236 chronic infections with anti-parasitic chemotherapy (benznidazole or nifurtimox) may therefore be  
237 beneficial to prevent or alleviate DCD. Outstanding questions include whether the patchiness of ENS  
238 damage is explained by the stochastic distribution of parasites, or because particular subsets of  
239 ganglia or neurons differ in susceptibility, and if so, why. We focussed on analysis of neurons in the  
240 myenteric plexus, but it will be important to explore other ENS components, including potential  
241 regulatory or neuroprotective functions of enteric glial cells<sup>38</sup> and broader factors known to  
242 influence neuro-immune interactions in the gut, such as host metabolism<sup>39</sup> and microbiota<sup>40</sup>.

243

## 244 **Materials and Methods**

245

### 246 **Parasites and infections**

247

248 Transgenic clones of *T. cruzi* TcI-JR and TcVI-CLBR constitutively expressing the red-shifted firefly  
249 luciferase variant *PPyRE9h*<sup>15</sup> alone or fused to mNeonGreen were described previously<sup>9,25</sup>.  
250 Equivalent clones for other *T. cruzi* strains were generated by transfection of the DNA construct  
251 pTRIX2-RE9h (TcI-C8, TcI-X10/4, TcIII-Arma18, TcVI-Peru), or by cas9-mediated replacement of the  
252 LucRE9h gene with dual reporters, namely LucRE9h::Neon (TcVI-CLBR, TcII-Pot7a, TcIV-X10610) and  
253 LucRE9h::mScarlet (TcI-ArePe, TcI-SN3), using the T7 RNA polymerase/cas9 system<sup>25</sup>. *In vitro*  
254 epimastigotes were cultivated in supplemented RPMI-1640 medium at 28°C with 150 µg ml<sup>-1</sup> G418 or  
255 hygromycin B, 5 µg ml<sup>-1</sup> puromycin or 10 µg ml<sup>-1</sup> blasticidin as appropriate. Metacyclic  
256 trypomastigotes (MTs) from stationary phase cultures were used to infect MA104 monkey kidney  
257 epithelial cell monolayers in MEM media + 5% FBS at 37°C and 5% CO<sub>2</sub>. Tissue culture  
258 trypomastigotes (TCTs) were obtained from the supernatant of infected cells after 5 to 21 days,  
259 depending on the parasite strain.

260

### 261 **Animals and infections**

262

263 All *in vivo* experiments were performed in accordance with UK Home Office regulations under the  
264 Animal Scientific Procedure Act (ASPA) 1986, project license 70/8207 or P9AEE04E, and were  
265 approved by LSHTM Animal Welfare Ethical Review Board. Female BALB/c and C3H/HeN mice,  
266 postnatal days 42-56, were purchased from Charles River (UK). Female CB17 SCID mice were bred in-  
267 house. All mice were housed on a 12 hr light/dark cycle, with food and water available *ad libitum*  
268 unless otherwise stated. Mice were maintained under specific pathogen-free conditions in  
269 individually ventilated cages.



270

271 SCID mice were infected with up to  $5 \times 10^5$  *in vitro*-derived TCTs in 0.2 ml PBS via i.p. injection. All  
272 infected SCID mice developed fulminant infections and were euthanised at or before humane end-  
273 points. Blood trypomastigotes (BTs) were derived from parasitaemic SCID mouse blood directly or  
274 after enrichment, achieved by allowing blood samples to settle for 1 hr at 37° C. BALB/c and C3H  
275 mice were infected by i.p injection of  $10^3$  or  $10^4$  BTs or TCTs depending on the experiment.

276

277 At experimental end-points, mice were sacrificed by ex-sanguination under terminal anaesthesia  
278 (Euthatal/Dolethal 60 mg kg<sup>-1</sup>, i.p.) or by cervical dislocation. Organs and tissues of interest were  
279 excised, imaged (see below) and either snap-frozen, fixed in 10% Glyofixx or transferred to ice-cold  
280 DMEM media. The weight of organs and tissues of interest were recorded.

281

### 282 **Total GI transit time assay**

283

284 Mice were gavaged p.o. with 200 µl of 6% w/v Carmine red dye solution in 0.5% methyl cellulose  
285 mixed in distilled water and returned to their home cage. After 75 min, mice were individually  
286 separated into containers and the time of excretion of the first red faecal pellet was recorded. A  
287 maximum assay cut-off time of 4 hr was implemented. Total intestinal transit time was calculated as  
288 the time taken from gavage to output of the first red pellet.

289

### 290 ***In vivo* bioluminescence imaging**

291

292 Mice were injected with 150 mg kg<sup>-1</sup> D-luciferin i.p., then anaesthetised using 2.5% (v/v) gaseous  
293 isoflurane in oxygen. After 10-20 min, bioluminescence imaging was performed using an IVIS Lumina  
294 II or Spectrum system (PerkinElmer), with acquisition time and binning adjusted according to signal  
295 intensity. Mice were revived and returned to cages after imaging. To estimate parasite burden in live  
296 mice, regions of interest (ROIs) were drawn to quantify bioluminescence expressed as total flux  
297 (photons/second)<sup>8,9</sup>. The detection threshold was determined using uninfected control mice. All  
298 bioluminescence data were analysed using LivingImage v4.7.3.

299

### 300 ***Ex vivo* bioluminescence imaging**

301

302 Mice were injected with 150 mg kg<sup>-1</sup> D-luciferin i.p. 5-7 min before euthanasia. Trans-cardiac  
303 perfusion was performed with 10 ml of 0.3 mg ml<sup>-1</sup> D-luciferin in PBS. Tissues and organs of interest

304 (typically lymph nodes, heart, spleen, skeletal muscle, GI tract and associated mesenteries) were  
305 collected and soaked in PBS containing 0.3 mg ml<sup>-1</sup> D-luciferin. Bioluminescence imaging was  
306 performed as above. To quantify parasite load as a measure of infection intensity, bioluminescence  
307 was calculated by outlining region of interest (ROI) on each sample and expressed as radiance  
308 (photons second<sup>-1</sup> cm<sup>-2</sup> sr<sup>-1</sup>). Fold change in radiance was determined by comparing samples from  
309 infected mice with the equivalent tissues from uninfected, age-matched control mice. To determine  
310 the detection threshold, fold change in radiance of an empty ROI on images from infected mice were  
311 compared with matching empty ROI on images from uninfected controls <sup>8</sup>.

312

### 313 **Fluorescent tracer transit assay**

314

315 Mice were fasted (or not) for 2 or 4 hr before euthanasia. They were administered 70-kDa FITC  
316 dextran (100 µl, 5 mg ml<sup>-1</sup> d.H<sub>2</sub>O) or Rhodamine dextran (100 µl, 10mg ml<sup>-1</sup> d.H<sub>2</sub>O) by oral gavage 5,  
317 45 or 90 min before euthanasia to target the stomach, small or large intestine transit, respectively. As  
318 an extension of the *ex vivo* bioluminescence necropsy (see above), fluorescence images were  
319 obtained using excitation filters set at 465/535 nm and emission filters at 502/583 nm for  
320 FITC/Rhodamine (f-stop: 16, exposure: 2 s). The relative fluorescence of the tracers was measured  
321 from the images by drawing ROIs using LivingImage 4.7.3 software. The GI tract images starting from  
322 the stomach to the colon were cut digitally in 15 equal segments and the centre of mass (geometric  
323 centre) of the signals were determined. The geometric centre was calculated using the following  
324 equation, GC =  $\sum (\% \text{ of total fluorescent signal per segment} * \text{segment number}) / 100$  <sup>41</sup>.

325

### 326 **Faecal analyses**

327

328 The colon tissue was separated and cleaned externally with PBS. The faecal pellets were gently  
329 removed from the lumen of the colon, counted and the combined wet weight was recorded. The  
330 faecal pellets were collected into a 12-well plate and left to dry in a laminar flow cabinet overnight.  
331 The dry weight was then recorded and the percent water content was estimated as the difference  
332 between wet and dry weights.

333

### 334 **Histopathology and Immunohistochemistry**

335

336 Paraffin-embedded, fixed tissue blocks were prepared and 3-5 µm sections were stained with  
337 haematoxylin and eosin as described <sup>9,42</sup>. For tubulin β-3 immunohistochemistry, sections were

338 subjected to heat-induced epitope retrieval by incubation in 10 mM sodium citrate, 0.05% Tween20  
339 for 30 min then cooled and rinsed in distilled water. Sections were blocked with 10% sheep serum  
340 and 1% BSA in TBS for 30 min then incubated at 4°C overnight with 1 µg ml<sup>-1</sup> rabbit polyclonal anti-  
341 tubulin β-3 IgG (Biolegend) and 1% BSA in TBS. Sections were then washed with 0.025% Triton X-100  
342 in TBS and endogenous peroxidase activity was quenched with 3% H<sub>2</sub>O<sub>2</sub> for 30min. Bound primary  
343 antibody was labelled with excess volume of HRP polymer anti-rabbit IgG reagent (Vector Labs) with  
344 1% BSA in TBS for 30 min. Slides were then washed as previously and incubated with DAB (Thermo)  
345 for 5 min. Sections were counterstained with haematoxylin and mounted with DPX.

346

347 Images were acquired using a Leica DFC295 camera attached to a Leica DM3000 microscope. For  
348 analysis of inflammation, nuclei were counted automatically using the Leica Application Suite V4.5  
349 software (Leica). DAB intensity was analysed as integrated density in ImageJ.

350

### 351 **Immunofluorescence analysis**

352

353 Colon tissues were transferred into ice-cold DMEM after necropsy. Tissues were cut open along the  
354 mesentery line, rinsed with PBS, then stretched and pinned on Sylgard 184 plates. The mucosal layer  
355 was peeled away using forceps under a dissection microscope and the remaining muscularis wall  
356 tissue was fixed in paraformaldehyde (4% w/v in PBS) for 45 min at room temperature. Tissues were  
357 washed with PBS for up to 45 min at room temperature and permeabilised with PBS containing 1%  
358 Triton X-100 for 2 hr, followed by blocking for 1 hr (10% sheep serum in PBS containing 1% Triton X-  
359 100). Tissues were incubated with primary antibodies (mouse anti-HuC/D IgG clone 16A11 at 1:200  
360 [ThermoFisher], rabbit polyclonal anti-tubulin β-3 IgG at 1:500 [Biolegend]) in PBS containing 1%  
361 Triton X-100 for 48 h at 4 °C. Tissues were washed with PBS, then incubated with secondary IgG (goat  
362 anti-mouse Alexa546, goat anti-rabbit Alexa633, both 1:500, ThermoFisher) in PBS containing 1%  
363 Triton X-100 for 2 h and counterstained with Hoechst 33342 (1:10 000) at room temperature. To  
364 assess antibody specificity, control tissues were incubated without the primary antibody. Tissues  
365 were mounted on glass slides using FluorSave mounting medium (Merck).

366

367 Whole mounts were examined and imaged with a LSM880 confocal microscope using a 40x objective  
368 (Zeiss, Germany). Images were captured as Z-stack scans of 21 digital slices with interval of 1 µm  
369 optical thickness. Five Z-stacks were acquired per region (proximal, mid and distal colon), per animal.  
370 Cell counts were performed on Z-stacks after compression into a composite image using the cell  
371 counter plug-in of FIJI software. Neuronal density was calculated as the number of HuC/D<sup>+</sup> neuron

372 cell bodies per field of view. HuC/D signal was associated with high background outside ganglia in  
373 samples from infected mice, attributed to binding of the secondary anti-mouse IgG to endogenous  
374 IgG, so ENS-specific analysis was aided by anti-TuJ1 co-labelling and assessment of soma morphology.  
375 The number of intact ganglia in each myenteric plexus image was also counted, along with number of  
376 HuC/D<sup>+</sup> neurons per ganglia.

377

### 378 **RT-qPCR**

379

380 Colon tissue samples were snap frozen on dry ice and stored at  $-70^{\circ}\text{C}$ . For RNA extraction, samples  
381 were thawed and homogenised in 1 ml Trizol (Invitrogen) per 30-50 mg tissue using a Precellys 24  
382 homogeniser (Bertin). To each sample, 200  $\mu\text{l}$  of chloroform was added and mixed by vortex after  
383 which the phases were separated by centrifugation at 13,000 g at  $4^{\circ}\text{C}$ . RNA was extracted from the  
384 aqueous phase using the RNeasy Mini Kit (Qiagen) with on-column DNase digestion as per  
385 manufacturer's protocol. The quantity and quality of RNA was assessed using Qubit Fluorimeter  
386 (ThermoFisher). cDNA was synthesised from 1  $\mu\text{g}$  of total RNA using Superscript IV VIL0 mastermix  
387 (Invitrogen), as per manufacturer's protocol, in reaction volumes of 20  $\mu\text{l}$ . A final cDNA volume of  
388 100  $\mu\text{l}$  was made by adding RNase-free DEPC water (1:5 dilution) and stored at  $-20^{\circ}\text{C}$  until further  
389 use. qPCR reactions contained 4  $\mu\text{l}$  of cDNA (1:50 dilution) and 200 nM of each primer  
390 (supplementary table 1) and QuantiTect SYBR Green PCR master mix (Qiagen) or SensiFAST SYBR Hi-  
391 ROX kit (Bioline). Reactions were run using Applied Biosystems 7500 fast RT-PCR machine  
392 (ThermoFisher) as per manufacturer's protocol. Data were analysed by the  $\Delta\Delta\text{Ct}$  method<sup>43</sup> using  
393 murine *Gapdh* as the endogenous control gene.

394

### 395 **Statistics**

396

397 Individual animals were used as the unit of analysis. No blinding or randomisation protocols were  
398 used. Statistical differences between groups were evaluated using unpaired two-tailed Student's t-  
399 test or one-way ANOVA with Tukey's post-hoc correction for multiple comparisons. Pearson  
400 correlation analyses was used to evaluate relationships between variables. These tests were  
401 performed in GraphPad Prism v.8 or R v3.6.3. Differences of  $p < 0.05$  were considered significant.

402 **Figures**

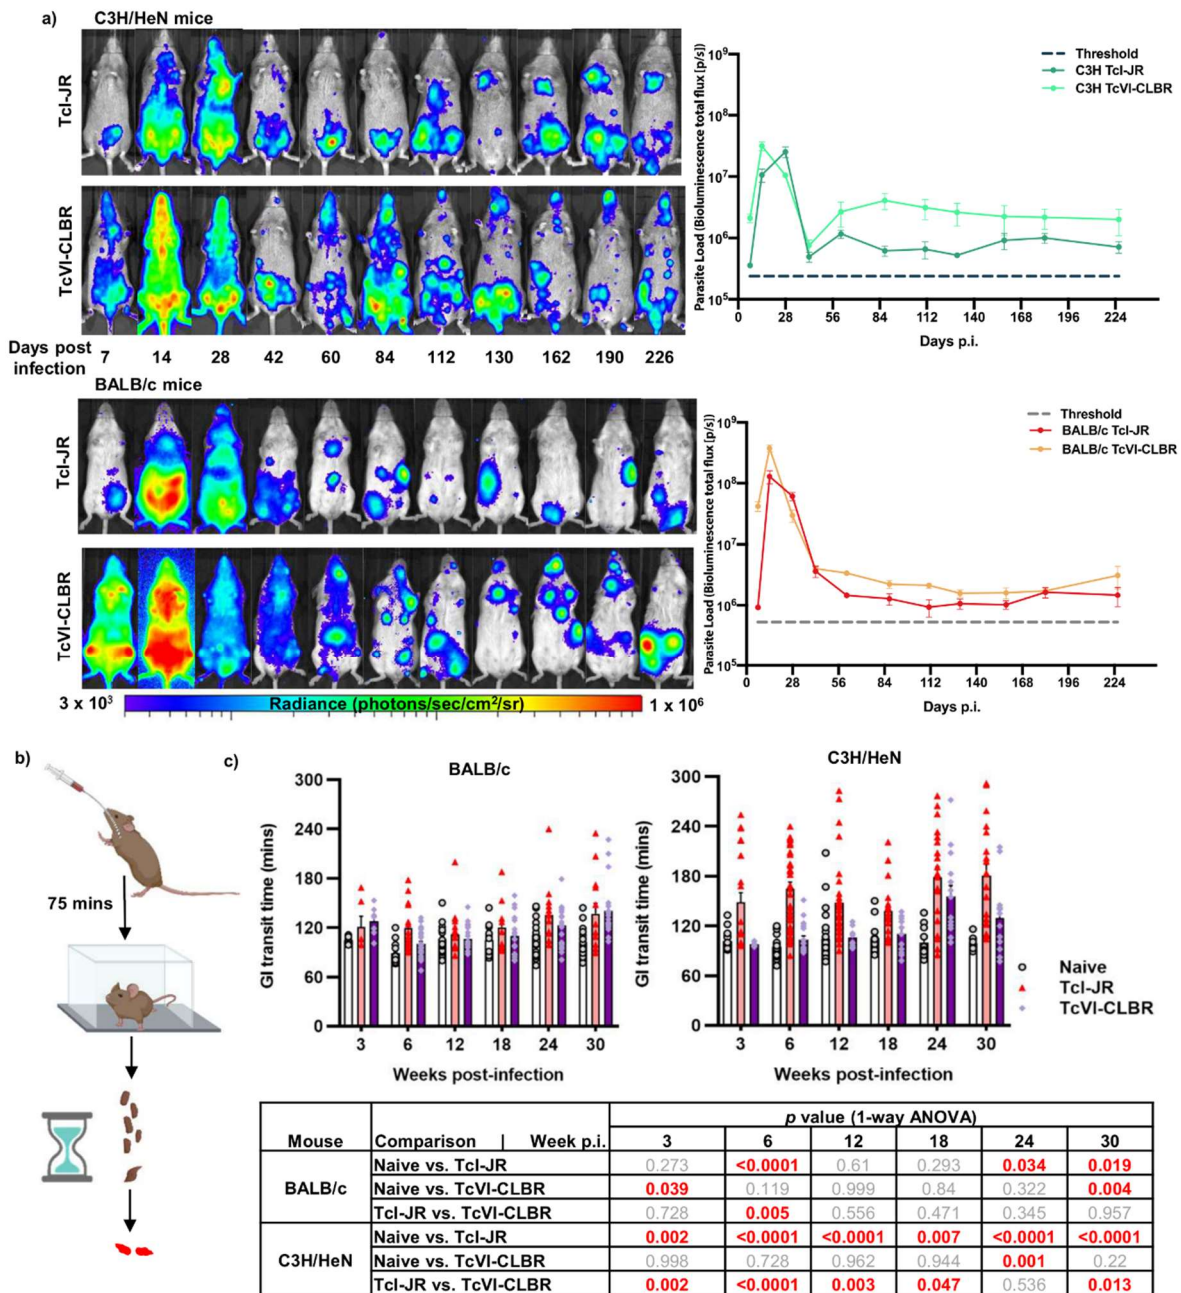

403

404 **Figure 1: Bioluminescence imaging *T. cruzi* infection models and digestive transit dysfunction**

405 **screen. a)** Ventral images of female C3H/HeN (top panels) and BALB/c mice (bottom panels)

406 representing TcI-JR (1<sup>st</sup> and 3<sup>rd</sup> panel) and TcVI-CLBR (2<sup>nd</sup> and 4<sup>th</sup> panel) course of infection. Images

407 were captured using *in vivo* bioluminescence imaging. Overlaid log-scale pseudocolour heat maps

408 are representative of bioluminescence intensity; the log-scale range is indicated in units of radiance.

409 Adjacent line plots show parasite load represented in average bioluminescence of TcI-JR C3H/HeN (*n*

410 = 10-24), TcVI-CLBR C3H/HeN (*n* = 5-12), TcI-JR BALB/c (*n* = 5-12) and TcVI-CLBR BALB/c (*n* = 9-22)

411 infected mice against days post infection (p.i.). Limit of detection of bioluminescence is indicated as

412 threshold by dashed line. **b)** Schematic diagram of the carmine red-dye assay to measure  
 413 gastrointestinal (GI) transit time delay in mice. **c)** Bar plots show GI transit time vs. weeks post-  
 414 infection (p.i.) of BALB/c (left) and C3H/HeN (right) mice in the following groups: naive control  
 415 BALB/c ( $n = 8-18$ ), TcI-JR BALB/c ( $n = 6-17$ ), TcVI-CLBR BALB/c ( $n = 10-29$ ), uninfected naive control  
 416 C3H/HeN ( $n = 12-35$ ), TcI-JR C3H/HeN ( $n = 18-38$ ) and TcVI-CLBR C3H/HeN ( $n = 6-17$ ). Table (bottom)  
 417 summarises statistical comparisons of GI transit time delay between groups. All statistically  
 418 significant values are highlighted (red). Data are expressed as mean  $\pm$  SEM. Statistical significance  
 419 was tested using one way ANOVA followed by Tukey's HSD test.  
 420

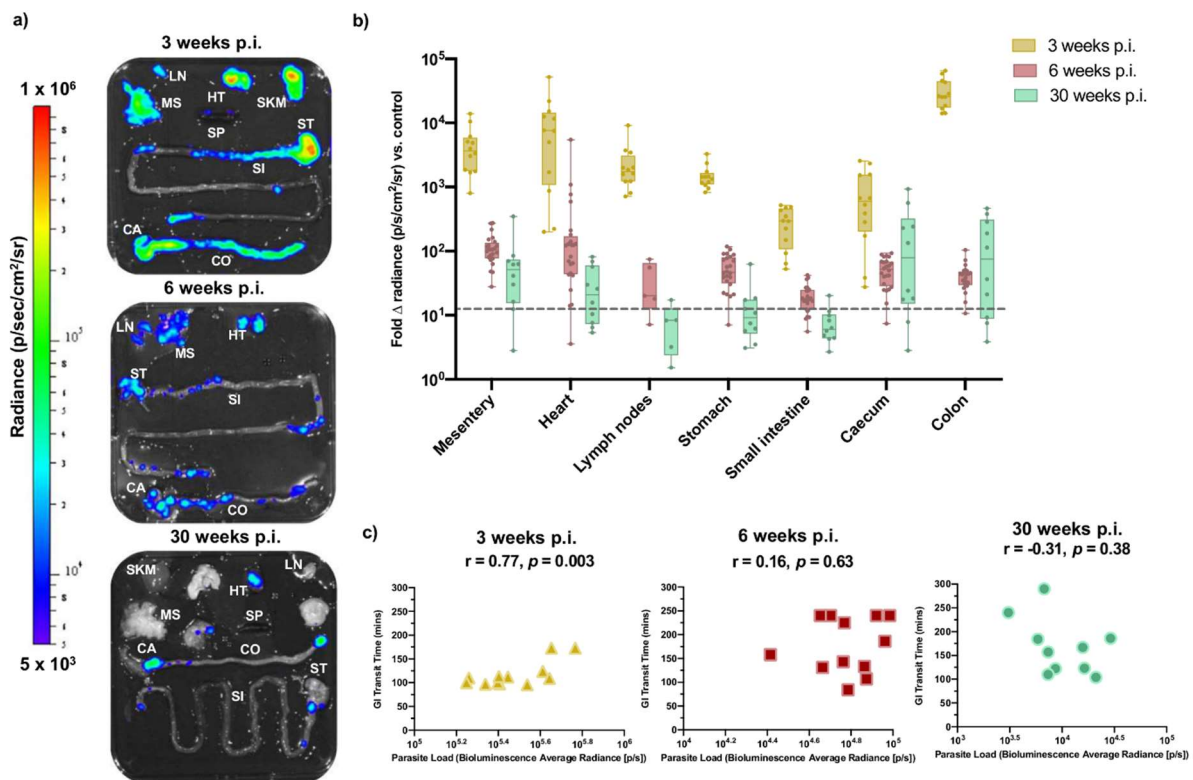

421  
 422 **Figure 2: Tissue parasite distribution kinetics in TcI-JR-infected C3H/HeN mice. a)** Representative  
 423 images show parasite distribution in different organ tissue (lymph nodes- LN, gut mesenteric tissue-  
 424 MS, heart- HT, spleen- SP, skeletal muscle- SKM, stomach- ST, small intestine- SI, caecum- CA and  
 425 colon- CO) of a TcI-JR infected C3H mouse at 3, 6 and 30 weeks post-infection (p.i.) using *ex-vivo*  
 426 bioluminescence imaging. Overlaid log-scale pseudocolour heat maps are representative of  
 427 bioluminescence intensity; the log-scale range is indicated in units of radiance. **b)** Box-plots show  
 428 infection intensity of different organ tissue at 3 ( $n = 12$  per group), 6 ( $n = 24$  per group;  $n = 5$  lymph  
 429 nodes) and 30 ( $n = 10$  per group;  $n = 5$  lymph nodes) weeks p.i. Data points are expressed as fold  
 430 change in bioluminescence vs. naïve controls. Limit of detection is denoted as dashed line. The  
 431 horizontal line within each box indicates median and the whiskers denotes minimum and maximum

432 values of each dataset. **c)** Scatter plots show correlation between gastrointestinal transit time and  
 433 end-point parasite densities expressed as bioluminescence in radiance at 3 ( $n = 10$ ), 6 ( $n = 12$ ) and 30  
 434 ( $n = 10$ ) weeks p.i.;  $r$  denotes Pearson's correlation coefficient and  $p$ -value represents a measure of  
 435 statistical significance.  
 436

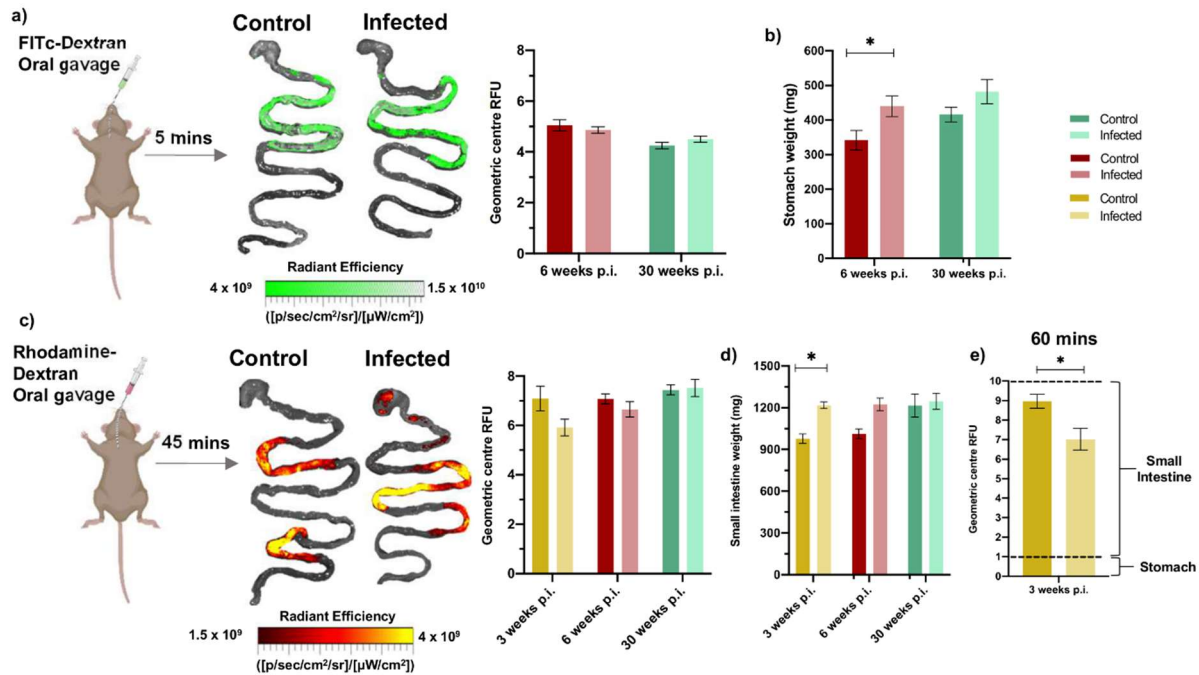

437

438

439 **Figure 3: Fluorescent tracer imaging assays for stomach emptying and small intestine transit. a)**

440 Schematic diagram of a mouse receiving oral gavage of a green fluorescent marker, 70-kDa FITC-  
 441 dextran, 5 minutes prior to termination to trace stomach emptying delay during infection.

442 Representative images of stomach and small intestine are superimposed with traces of 70-kDa FITC-  
 443 dextran travelling through stomach into small intestine to show transit difference between control  
 444 and Tci-JR C3H/HeN infected mice. Linear-scale pseudocolour heat map shows minimum and  
 445 maximum fluorescence intensity of 70-kDa FITC-dextran.

446 Quantification of FITC-dextran fluorescence in control naïve and Tci-JR C3H/HeN is shown in the adjacent bar plot at 6 ( $n = 12$  per group) and 30  
 447 ( $n = 5$  per group) weeks post-infection (p.i.). Fluorescence is expressed as geometric centre which is  
 448 centre mass of the marker. **b)** Bar plot shows post-mortem weights of stomach with contents at 6 ( $n = 7$  per group) and 30 ( $n = 5$  per group) weeks p.i.

449 **c)** Similar schematic diagram and bar plot at 3 ( $n = 4$  per group), 6 ( $n = 4$  per group) and 30 ( $n = 5$  per group) weeks p.i. using a red fluorescent marker,  
 450 rhodamine-dextran, to target small intestine transit. Linear-scale pseudocolor heat map shows  
 451 minimum and maximum fluorescence intensity of rhodamine-dextran. **d)** Small intestine weights  
 452 shown in bar plot at 3 ( $n = 4$  per group), 6 ( $n = 7$  per group) and 30 ( $n = 5$  per group) weeks p.i. **e)**

453

454 Bar plot shows quantification of rhodamine-dextran fluorescence administered 60 minutes before  
 455 termination of mice at 3 weeks p.i. ( $n = 4$  per group). Dashed lines on bar plots show the GI segment  
 456 number corresponding to the geometric centre score (0-1= stomach, 1-10 = small intestine). Data  
 457 are expressed as mean  $\pm$  SEM. Statistical significance was tested using unpaired two-tailed Student's  
 458 t test ( $*P < 0.05$ ).  
 459

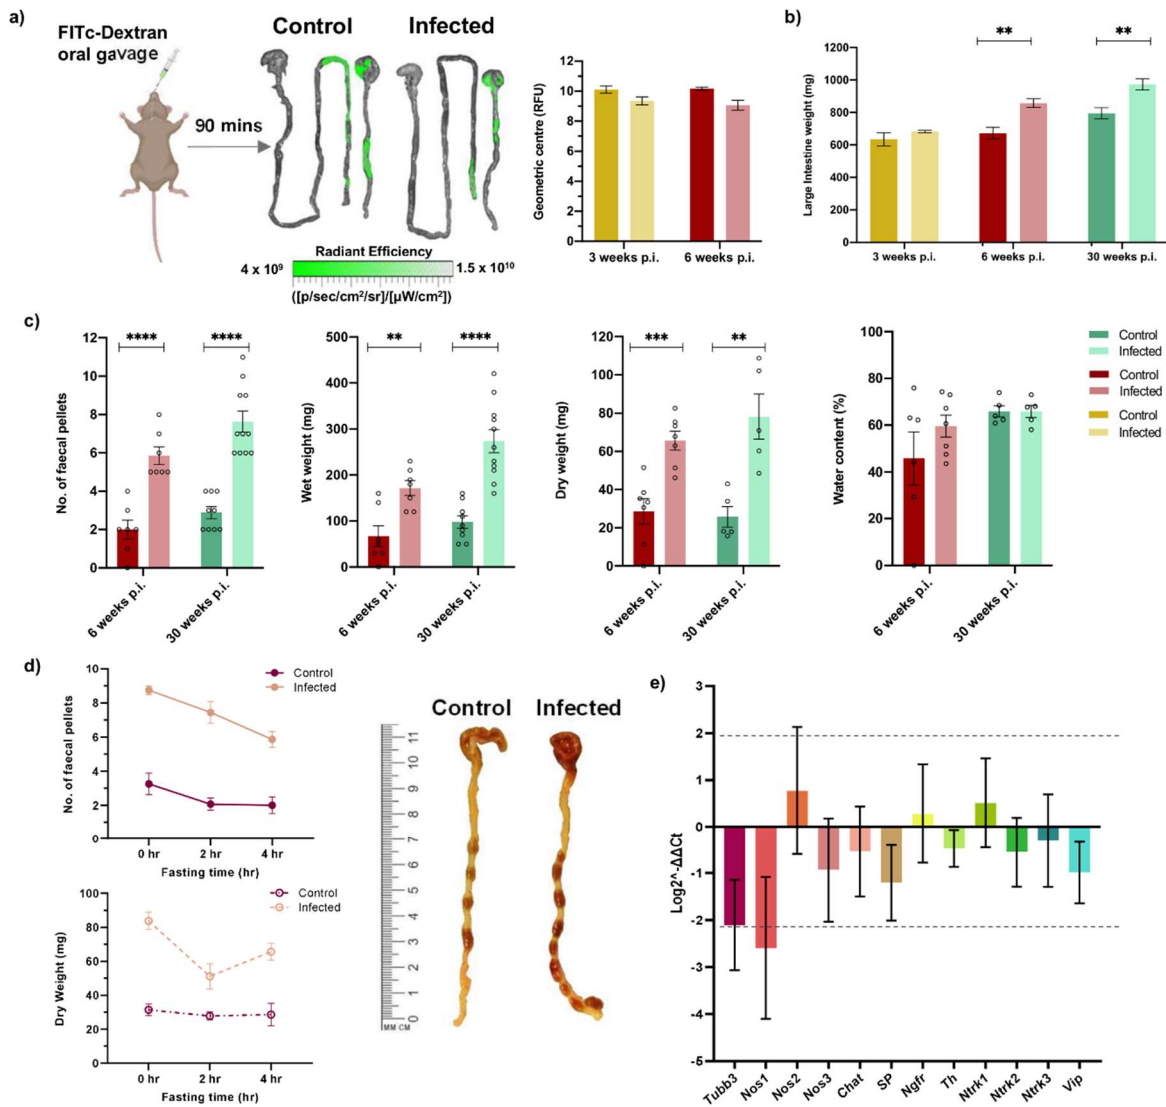

460  
 461 **Figure 4: Evidence of colonic transit dysfunction in experimental digestive Chagas disease model.**

462 **a)** Schematic diagram of a mouse receiving oral gavage of a green fluorescent marker, 70-kDa FITC-  
 463 dextran, 90 min prior to termination to trace large intestine transit delay during infection.  
 464 Representative images of stomach, small and large intestine are superimposed with traces of 70-kDa  
 465 FITC-dextran travelling through small into large intestine to show transit difference between control  
 466 and Tci-JR C3H/HeN infected mice. Linear-scale pseudocolor heat map shows minimum and  
 467 maximum fluorescence intensity of 70-kDa FITC-dextran. Bar plots show quantification of 70-kDa



468 FITC-dextran fluorescence in the large intestine of mice at 3 ( $n = 4$  per group) and 6 ( $n = 4$  per group)  
469 weeks post-infection (p.i.). Fluorescence is expressed as geometric centre which is centre mass of  
470 the marker. **b)** Bar plot shows post-mortem weights of large intestine at 3 ( $n = 4$  per group), 6 ( $n = 7$   
471 per group) and 30 (control  $n = 9$ , Tci-JR  $n = 11$ ) weeks p.i. **c)** Faecal output analyses between control  
472 and Tci-JR C3H/HeN infected mice are expressed as faecal pellet count, wet and dry weight, and  
473 percentage of water content at 6 ( $n = 7$  per group) and 30 weeks p.i. ( $n = 5-11$  per group). **d)**  
474 Quantification of the effect of different fasting times on faecal output of mice: number of faecal  
475 pellets ( $n = 4-16$  per group) and dry faecal weight ( $n = 4-7$  per group). Images of mouse large  
476 intestine showing faecal impaction during infection at 30 weeks p.i. after 4 hours fasting compared  
477 to control. Scale bar is in cm and mm. Data are expressed as mean  $\pm$  SEM. Statistical significance was  
478 tested using unpaired two-tailed Student's t test (\*\* $P < 0.01$ ; \*\*\* $P < 0.001$ , \*\*\*\* $P < 0.0001$ ). **e)** RT-  
479 qPCR analysis show log<sub>2</sub>-fold change in RNA expression of neuronal specific markers: *Tubb3*, *Nos1*,  
480 *Nos2*, *Nos3*, *Chat*, *SP*, *Ngfr*, *Th*, *Ntrk1*, *Ntrk2*, *Ntrk3* and *Vip* in the colon tissue of C3H/HeN naïve  
481 control and Tci-JR infected mice ( $n = 5$  per group, biological replicates). Data are expressed as Log<sub>2</sub>-  
482  $\Delta\Delta Ct \pm SD$ . Dashed line represents mean  $\pm 2SD$  based on distribution of naïve group values.  
483

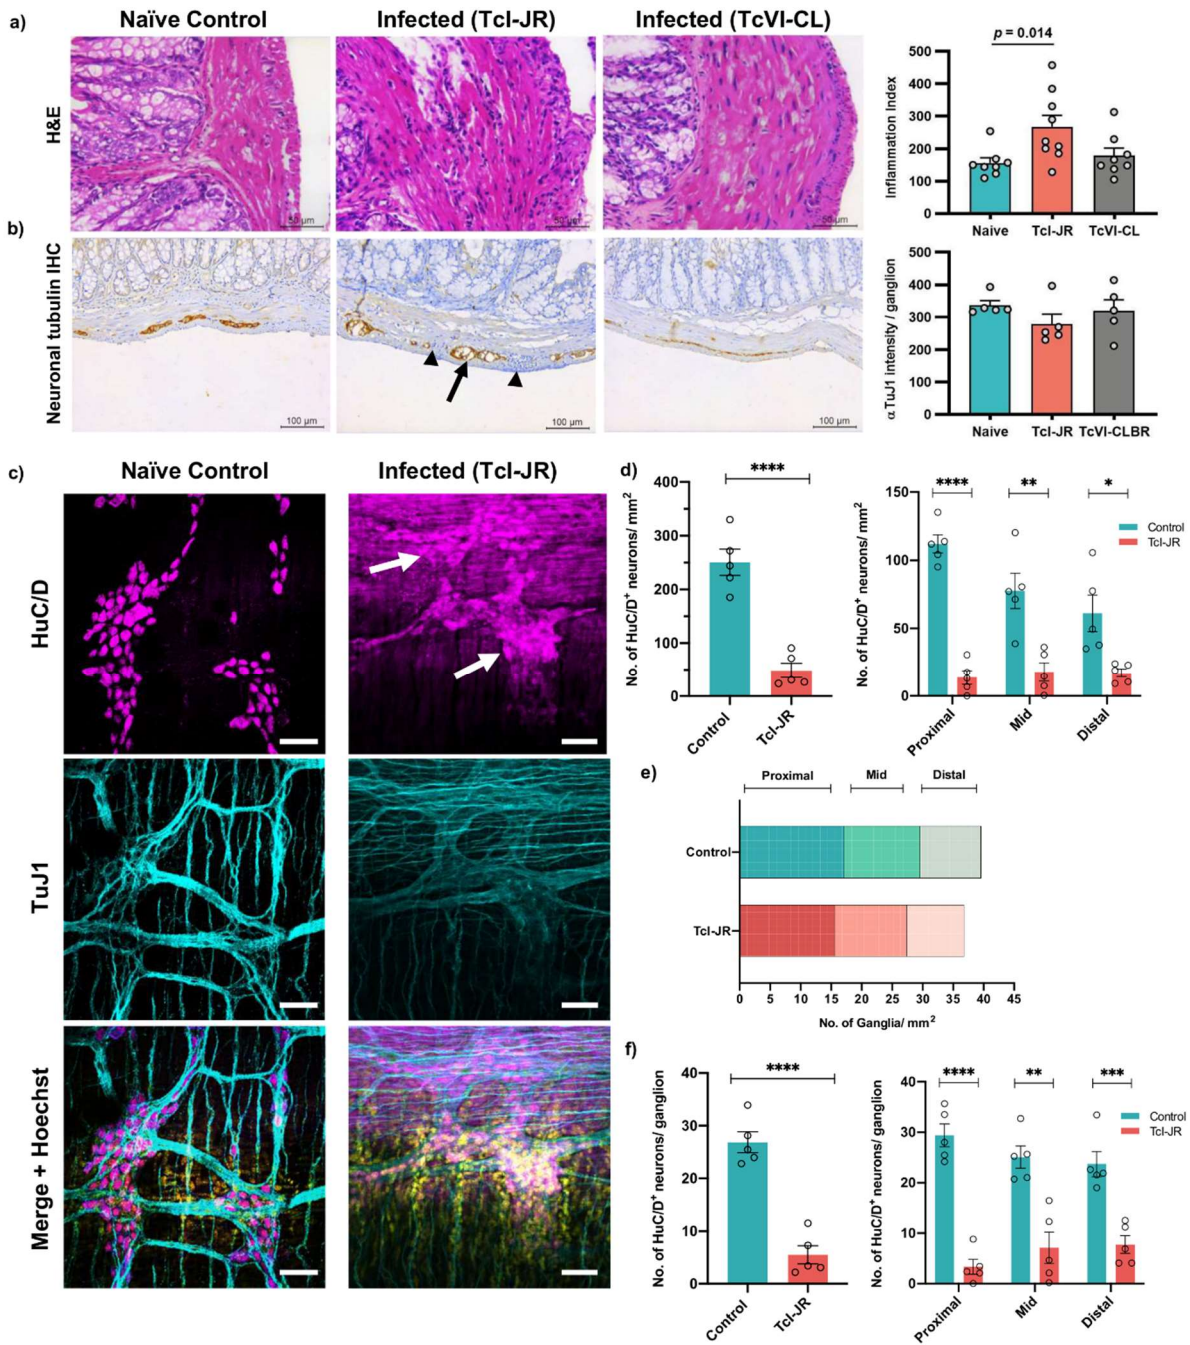

484

485 **Figure 5: Effects of chronic *T. cruzi* infection on the enteric nervous system. a)** Representative  
 486 brightfield images of 5  $\mu\text{m}$  thick colon sections stained with haematoxylin-eosin. Images were taken  
 487 at 100x magnification, scale bar = 50  $\mu\text{m}$ . Adjacent bar plot shows number of nuclei per field to  
 488 quantify cellular infiltration in Tcl-JR ( $n = 8$ ), TcVI-CLBR ( $n = 10$ ) infected mice compared to naïve  
 489 controls ( $n = 8$ ). **b)** Representative brightfield images of 5  $\mu\text{m}$  thick colon sections to detect change in  
 490 pathology during *T. cruzi* infection detected by immunohistochemistry. Images were taken at 100x  
 491 magnification, scale bar = 50  $\mu\text{m}$ . Adjacent bar plot shows percentage of neuronal tubulin (Tuj1)  
 492 immunoreactivity in naïve control ( $n = 8$ ), Tcl-JR- ( $n = 8$ ) and TcVI-CLBR ( $n = 9$ ) infected mice. **c)**  
 493 Representative immunofluorescent confocal images of whole-mount colon samples to show the

494 change in anti-HuC/D stained neuronal cell bodies (magenta, top panel) and anti-Tuj1 stained neural  
 495 network (cyan, middle panel) in the myenteric plexus during *T. cruzi* infection. Bottom panel shows  
 496 merged images with DAPI nuclei stain (yellow). White arrows indicate damaged ganglionic neuronal  
 497 cell bodies. Images were taken at 40x magnification, scale bar: 50  $\mu\text{m}$ . **d)** Bar plots show number of  
 498 HuC/D positive neuronal cell bodies per field of view in naïve control and Tci-JR infected whole colon  
 499 samples (left) and from selected regions of the colon: proximal, mid and distal (right;  $n = 5$  per  
 500 group, all). **e)** Quantification of number of ganglia in naïve control and Tci-JR infected samples from  
 501 proximal, mid and distal colon ( $n = 5$  per group). **f)** Bar plots show number of HuC/D positive  
 502 neuronal cell bodies per ganglion in naïve control and Tci-JR infected whole colon samples (left) and  
 503 from selected regions of the colon: proximal, mid and distal (right;  $n = 5$  per group, all). All data and  
 504 images are obtained from matched naïve control and infected mice at 30 weeks post-infection. Data  
 505 are expressed as mean  $\pm$  SEM. Statistical significance was tested using unpaired two-tailed Student's  
 506 t test ( $*P < 0.05$ ;  $**P < 0.01$ ;  $***P < 0.001$ ,  $****P < 0.0001$ ).  
 507

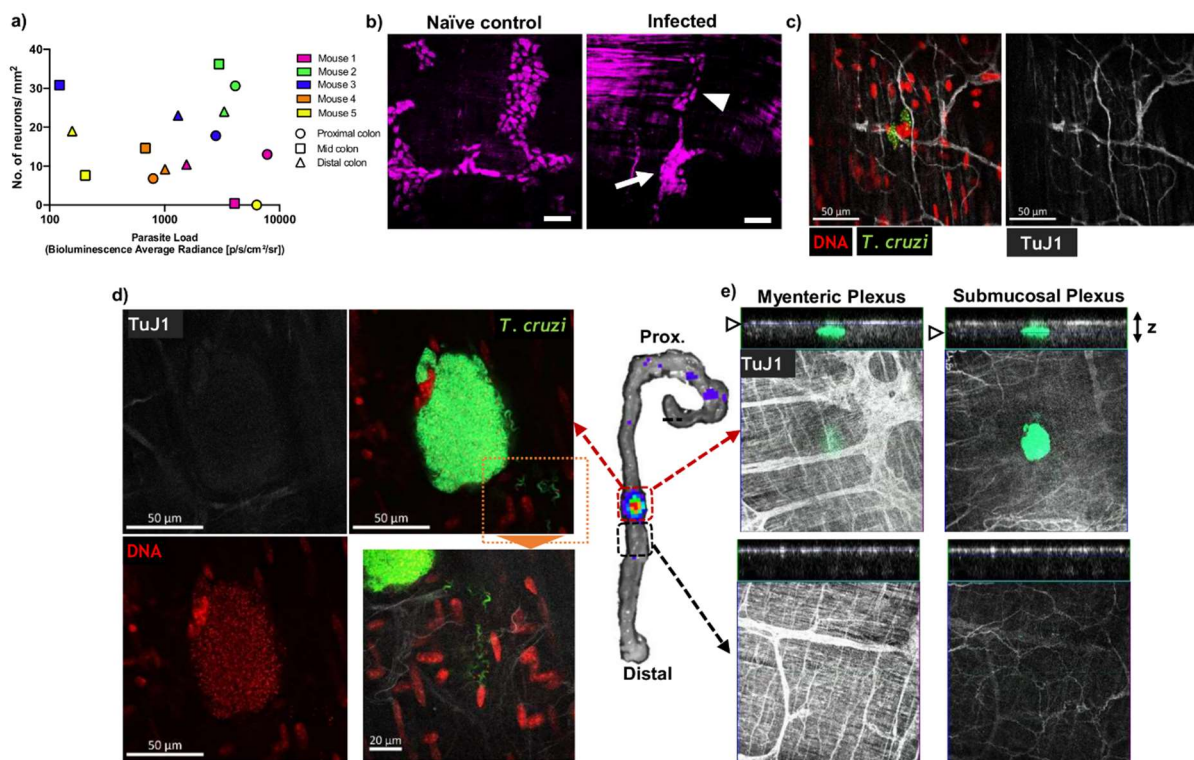

508  
 509 **Figure 6: Chronic phase colonic *T. cruzi* infection foci and ENS ablation at the tissue micro-domain**  
 510 **scale. a)** Lack of correlation between end-point colon parasite loads measured by *ex vivo*  
 511 bioluminescence intensity and degree of colon myenteric plexus denervation. **b-e)** Whole mount  
 512 (immuno)fluorescence analysis of colonic muscularis from C3H mice chronically infected with *T.*  
 513 *cruzi*. **b)** HuC/D+ neuronal cell bodies in colonic myenteric ganglia. Naïve control shows normal  
 514 morphology; infected mice exhibit adjacent ganglia with both intact (arrowhead) and disrupted

515 (arrow) staining patterns. **c**) Imaging individual *T. cruzi* (mNeonGreen<sup>+</sup>) infected cells at early stage of  
516 parasite replication cycle adjacent to intact enteric neuron fibres (TuJ1<sup>+</sup>). **d-e**) Bioluminescence *ex*  
517 *vivo* image (centre)-guided analysis of parasitized and parasite-free tissue micro-domains. **d**) Mature  
518 parasite pseudocyst containing >1000 flagellated trypomastigotes with extracellular trypomastigotes  
519 in the local tissue parenchyma (inset) with faint neuronal (TuJ1) staining. **e**) Z-stack slices at the level  
520 of myenteric and submucosal neuronal plexuses showing highly localised loss of TuJ1 staining  
521 around the rupturing parasite pseudocyst.  
522

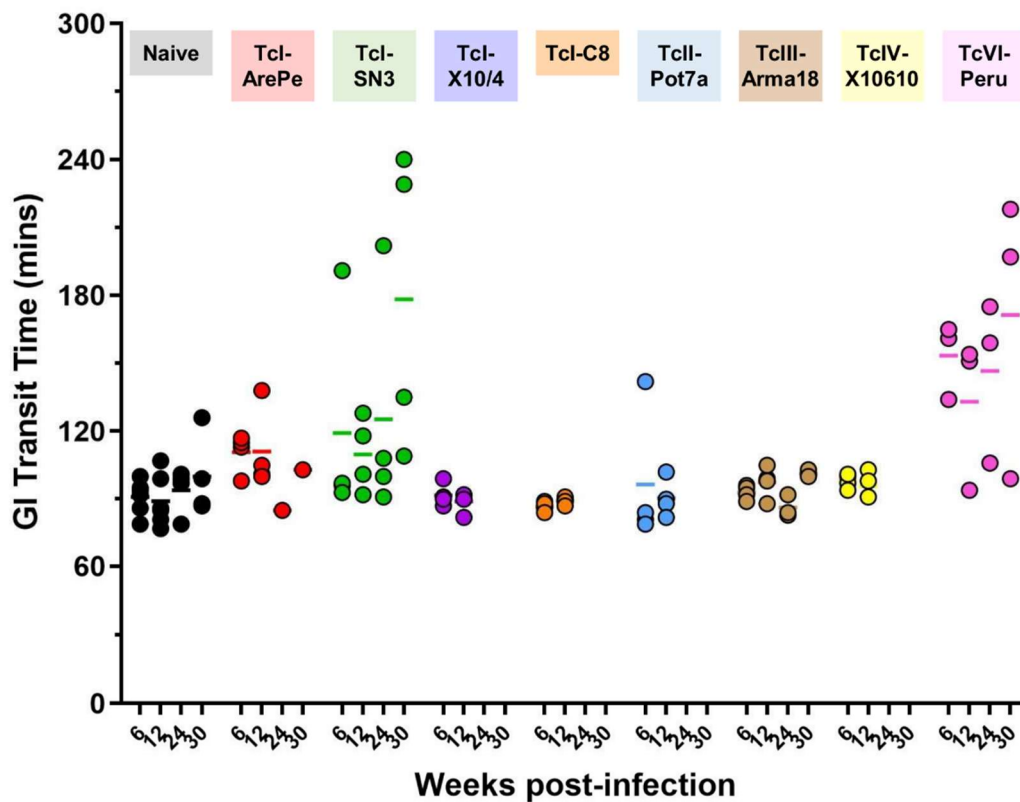

523  
524 **Supplementary Figure 1. Gastrointestinal transit dysfunction screen in mice infected with different**  
525 **strains of *T. cruzi*.** Data are gastrointestinal (GI) transit time at indicated weeks post-infection (p.i.)  
526 for C3H/HeN mice in the following infection groups: naive control (n = 4-6), TcI-ArePe (n = 1-4), TcI-  
527 SN3 (n = 4), TcI-SylvioX10/4 (n = 4) and TcI-C8 (n = 4), TcII-Pot7a (n = 4), TcIII-Arma18 (n = 3-4), TcIV-  
528 X10610 (n = 4) and TcVI-Peru (n = 3).  
529

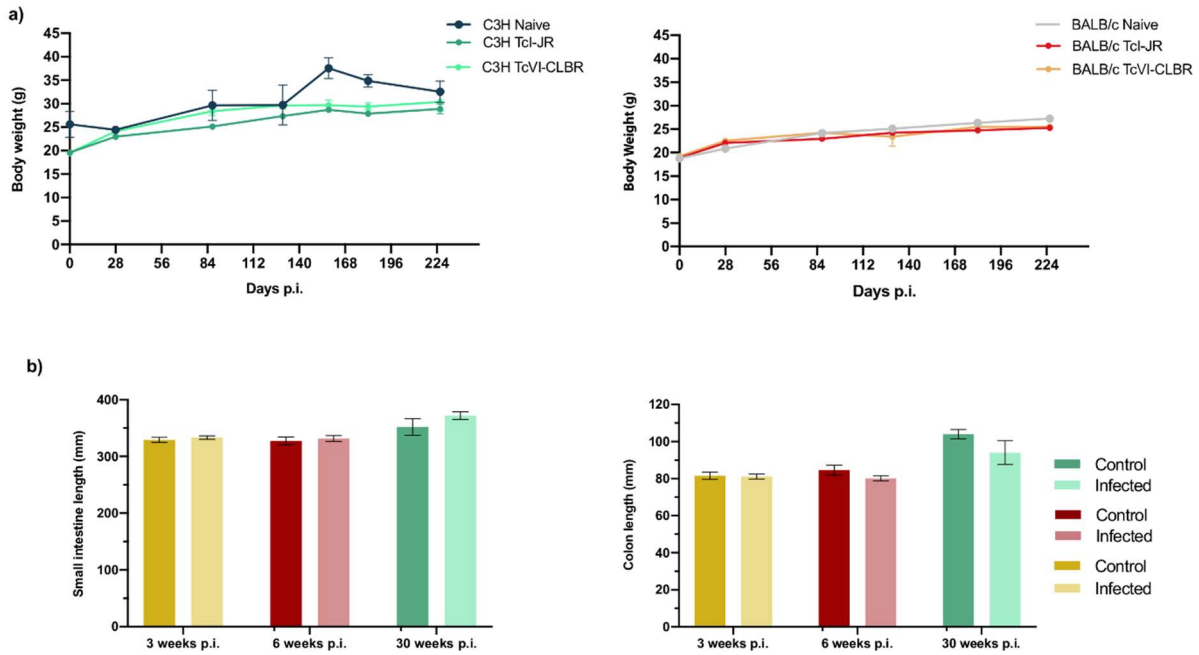

530

531 **Supplementary Figure 2. Anatomical measures of gastrointestinal *T. cruzi* infection mouse models.**

532 **a)** Body weights of naïve control ( $n = 3-10$ ), TcI-JR ( $n = 5-22$ ) and TcVI-CLBR ( $n = 5-20$ ) infected  
 533 C3H/HeN (left) and BALB/c mice (right) vs. days post-infection (p.i.). **b)** Bar plots show length of small  
 534 intestine and colon of control and TcI-JR C3H/HeN mice at 3 ( $n = 24$  per group), 6 ( $n = 27$  per group)  
 535 and 30 ( $n = 5$  per group) weeks p.i. Data are expressed as mean  $\pm$  SEM.

536

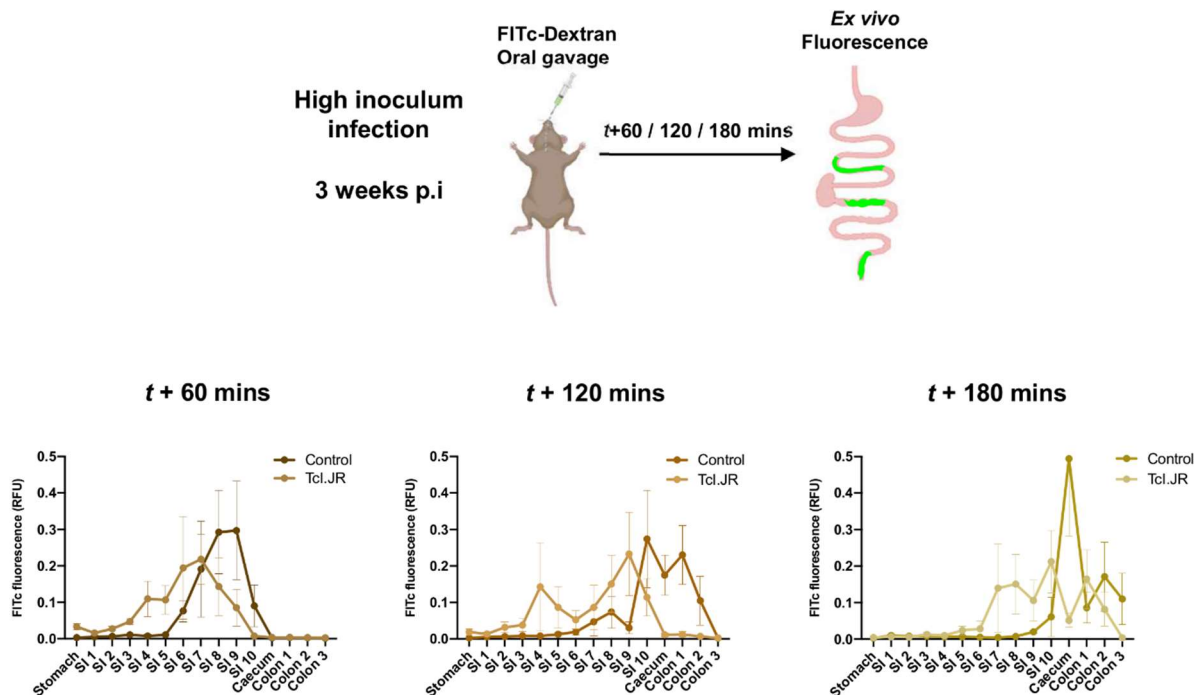

537

538 **Supplementary Figure 3. Fluorescent tracer imaging assay for gastrointestinal (GI) transit in high**

539 **acute *T. cruzi* infection.** Schematic diagram of a mouse receiving oral gavage of a green fluorescent

540 marker, 70-kDa FITc-dextran, 60 or 120 or 180 minutes prior to termination to trace localised GI  
541 transit delay during acute infection. Quantification of 70-kDa FITc-dextran fluorescence in different  
542 parts of the GI tract (S1-S210: small intestine scored into 10 equal sections) of naïve control and TcI-  
543 JR C3H/HeN ( $n = 4$  per group) mice at 3 weeks post-infection. All mice in this experiment were  
544 infected with a high inoculum of TcI-JR parasites. Data are expressed as mean  $\pm$  SEM.  
545

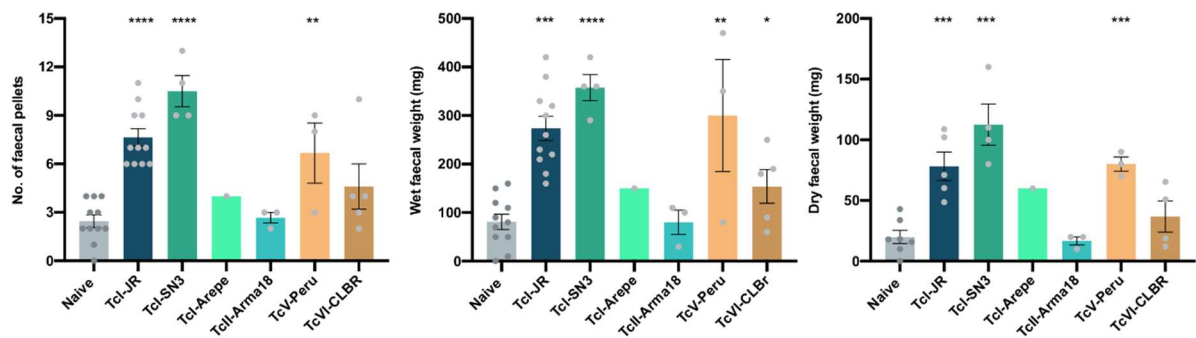

546  
547 **Supplementary Figure 4. Comparison of colonic transit dysfunction in different models of**  
548 **experimental digestive Chagas disease.** Faecal output analyses are expressed as faecal pellet count,  
549 wet and dry pellet weight at 30 weeks post-infection (p.i.) in the following groups: naïve control ( $n =$   
550  $7-11$ ), TcI-JR ( $n = 5-11$ ), TcI-SN3 ( $n = 4$ ), TcI-ArePe ( $n = 1$ ), TcIII-Arma18 ( $n = 3$ ), TcVI-Peru ( $n = 3$ ) and  
551 TcVI-CLBR ( $n = 4-5$ ).  
552

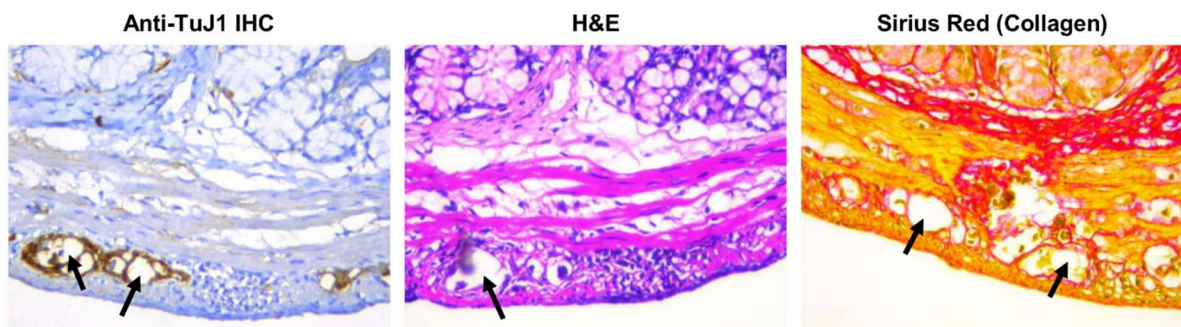

553  
554 **Supplementary Figure 5. Myenteric neuronal plexus lesions in *T. cruzi* infection.** Acellular  
555 structures (arrows) within myenteric plexus ganglia from C3H mice with chronic TcI-JR infections that  
556 are refractory to staining by the indicated method.  
557

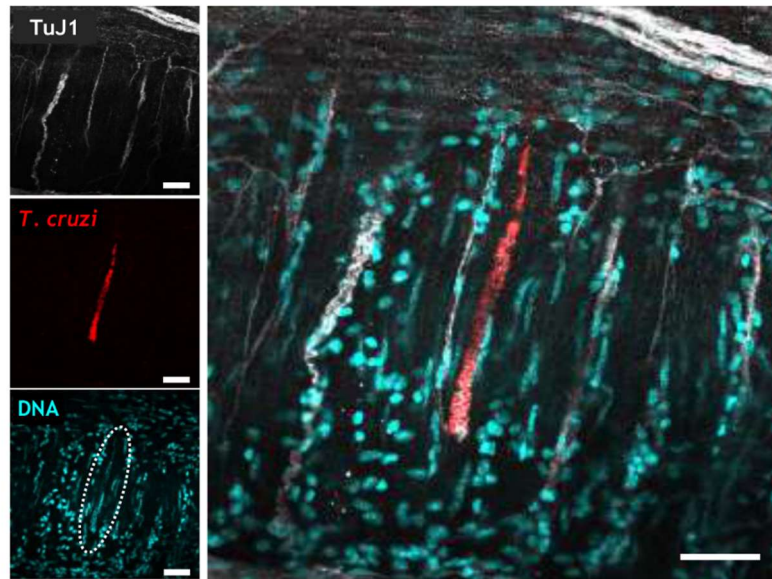

558

559 **Supplementary Figure 6. Chronic phase colonic *T. cruzi* infection foci of Tci-SN3 parasites in the**  
560 **ENS.** Representative immunofluorescent z-stack confocal images of whole-mount colonic muscularis  
561 from C3H mice chronically infected with fluorescent Tci-SN3 (scarlet+) parasites. Image shows the  
562 localisation of Tci-SN3 parasites (red) in the submucosal layer of the ENS stained with anti-Tuj1  
563 (phase). DAPI (cyan) shows nuclei stain and white circle indicates DNA of the parasite nest. Images  
564 were taken at 40x magnification, scale bar: 50  $\mu$ m.

565

## 566 Acknowledgements

567 We thank Hernán Carrasco, Michael Miles, Manuel Sánchez-Moreno, Omar Triana and Matthew Yeo  
568 for sharing parasite strains and the LSHTM Biological Services Facility staff for technical support and  
569 animal husbandry. Some figure panels were created with BioRender.com. The work was funded by an  
570 MRC New Investigator Research Grant (MR/R021430/1) and an EU Marie Curie Fellowship (grant  
571 agreement no. 625810).

572

## 573 References

- 574 1 Rassi Jr, A., Rassi, A. & Marin-Neto, J. A. Chagas disease. *Lancet* **375**, 1388-1402 (2010).  
575 2 Iantorno, G. *et al.* The enteric nervous system in chagasic and idiopathic megacolon. *Am J*  
576 *Surg Pathol* **31**, 460-468 (2007).  
577 3 Meneghelli, U. G. Chagasic enteropathy. *Revista da Sociedade Brasileira de Medicina Tropical*  
578 **37**, 252-260 (2004).  
579 4 Bern, C. Antitrypanosomal Therapy for Chronic Chagas' Disease. *New Engl J Med* **364**, 2527-  
580 2534, doi:doi:10.1056/NEJMct1014204 (2011).  
581 5 Köberle, F. Chagas' disease and Chagas' syndromes: the pathology of American  
582 trypanosomiasis. *Adv Parasitol* **6**, 63-116 (1968).  
583 6 de Oliveira, R. B., Troncon, L. E., Dantas, R. O. & Menghelli, U. G. Gastrointestinal

- 584 manifestations of Chagas' disease. *Am J Gastroenterol* **93**, 884-889 (1998).
- 585 7 Arantes, R. M. *et al.* Interferon-gamma-induced nitric oxide causes intrinsic intestinal  
586 denervation in *Trypanosoma cruzi*-infected mice. *Am J Pathol* **164**, doi:10.1016/s0002-  
587 9440(10)63222-1 (2004).
- 588 8 Lewis, M. D. *et al.* Bioluminescence imaging of chronic *Trypanosoma cruzi* infections reveals  
589 tissue-specific parasite dynamics and heart disease in the absence of locally persistent  
590 infection. *Cell Microbiol* **16**, 1285-1300, doi:10.1111/cmi.12297 (2014).
- 591 9 Lewis, M. D., Francisco, A. F., Taylor, M. C., Jayawardhana, S. & Kelly, J. M. Host and parasite  
592 genetics shape a link between *Trypanosoma cruzi* infection dynamics and chronic  
593 cardiomyopathy. *Cell Microbiol* **18**, 1429-1443, doi:10.1111/cmi.12584 (2016).
- 594 10 Laranjeira, C. *et al.* Glial cells in the mouse enteric nervous system can undergo neurogenesis  
595 in response to injury. *J Clin Invest* **121**, 3412-3424, doi:10.1172/JCI58200 (2011).
- 596 11 Kulkarni, S. *et al.* Adult enteric nervous system in health is maintained by a dynamic balance  
597 between neuronal apoptosis and neurogenesis. *PNAS* **114**, E3709-E3718,  
598 doi:10.1073/pnas.1619406114 (2017).
- 599 12 Muller, Paul A. *et al.* Crosstalk between Muscularis Macrophages and Enteric Neurons  
600 Regulates Gastrointestinal Motility. *Cell* **158**, 300-313,  
601 doi:<https://doi.org/10.1016/j.cell.2014.04.050> (2014).
- 602 13 Gabanyi, I. *et al.* Neuro-immune Interactions Drive Tissue Programming in Intestinal  
603 Macrophages. *Cell* **164**, 378-391, doi:<https://doi.org/10.1016/j.cell.2015.12.023> (2016).
- 604 14 do Carmo Neto, J. R. *et al.* Correlation between intestinal BMP2, IFN $\gamma$ , and neural  
605 death in experimental infection with *Trypanosoma cruzi*. *PLoS One* **16**, e0246692,  
606 doi:10.1371/journal.pone.0246692 (2021).
- 607 15 Branchini, B. R. *et al.* Red-emitting luciferases for bioluminescence reporter and imaging  
608 applications. *Anal Biochem* **396**, 290-297, doi:10.1016/j.ab.2009.09.009 (2010).
- 609 16 Machado, C. A. & Ayala, F. J. Nucleotide sequences provide evidence of genetic exchange  
610 among distantly related lineages of *Trypanosoma cruzi*. *Proc Natl Acad Sci U S A* **98**, 7396-  
611 7401, doi:10.1073/pnas.121187198 (2001).
- 612 17 Westenberger, S. J., Barnabé, C., Campbell, D. A. & Sturm, N. R. Two hybridization events  
613 define the population structure of *Trypanosoma cruzi*. *Genetics* **171**, 527-543,  
614 doi:10.1534/genetics.104.038745 (2005).
- 615 18 Lewis, M. D. *et al.* Recent, independent and anthropogenic origins of *Trypanosoma cruzi*  
616 hybrids. *PLoS Negl Trop Dis* **5**, e1363, doi:10.1371/journal.pntd.0001363 (2011).
- 617 19 da Silveira, A. B. *et al.* Neurochemical coding of the enteric nervous system in chagasic  
618 patients with megacolon. *Dig Dis Sci* **52**, 2877-2883, doi:10.1007/s10620-006-9680-5 (2007).
- 619 20 Nascimento, R. D., Martins, P.R., Duarte, G.D. & Reis, D.D. Decrease of Nitrergic Innervation  
620 in the Esophagus of Patients with Chagas Disease: Correlation with Loss of Interstitial Cells of  
621 Cajal. *International Journal of Pathology and Clinical Research* **3**, 59, doi:10.23937/2469-  
622 5807/1510059 (2017).
- 623 21 Dickson, E. J., Heredia, D. J., McCann, C. J., Hennig, G. W. & Smith, T. K. The mechanisms  
624 underlying the generation of the colonic migrating motor complex in both wild-type and  
625 nNOS knockout mice. *Am J Physiol Gastrointest Liver Physiol* **298**, G222-232,  
626 doi:10.1152/ajpgi.00399.2009 (2010).
- 627 22 McCann, C. J. *et al.* Transplantation of enteric nervous system stem cells rescues nitric oxide  
628 synthase deficient mouse colon. *Nat Commun* **8**, 15937, doi:10.1038/ncomms15937 (2017).
- 629 23 Rivera, L. R., Poole, D. P., Thacker, M. & Furness, J. B. The involvement of nitric oxide synthase  
630 neurons in enteric neuropathies. *Neurogastroenterology & Motility* **23**, 980-988,  
631 doi:<https://doi.org/10.1111/j.1365-2982.2011.01780.x> (2011).
- 632 24 Ward, A. I. *et al.* In Vivo Analysis of *Trypanosoma cruzi* Persistence Foci at Single-Cell  
633 Resolution. *mBio* **11**, e01242-01220, doi:10.1128/mBio.01242-20 (2020).
- 634 25 Costa, F. C. *et al.* Expanding the toolbox for *Trypanosoma cruzi*: A parasite line incorporating



- 635 a bioluminescence-fluorescence dual reporter and streamlined CRISPR/Cas9 functionality for  
636 rapid in vivo localisation and phenotyping. *PLoS Neglected Tropical Diseases* **12**, e0006388,  
637 doi:10.1371/journal.pntd.0006388 (2018).
- 638 26 Iantorno, G. *et al.* The enteric nervous system in chagasic and idiopathic megacolon. *Am J*  
639 *Surg Pathol* **31**, 460-468, doi:10.1097/01.pas.0000213371.79300.a8 (2007).
- 640 27 da Silveira, A. B. *et al.* Neuronal plasticity of the enteric nervous system is correlated with  
641 chagasic megacolon development. *Parasitology* **135**, 1337-1342,  
642 doi:10.1017/S0031182008004770 (2008).
- 643 28 Koeberle, F. Enteromegaly and Cardiomegaly in Chagas Disease. *Gut* **4**, 399-405,  
644 doi:10.1136/gut.4.4.399 (1963).
- 645 29 Campos, C. F. *et al.* Enteric Neuronal Damage, Intramuscular Denervation and Smooth  
646 Muscle Phenotype Changes as Mechanisms of Chagasic Megacolon: Evidence from a Long-  
647 Term Murine Model of *Trypanosoma cruzi* Infection. *PLoS ONE* **11**, e0153038,  
648 doi:10.1371/journal.pone.0153038 (2016).
- 649 30 Ricci, M. F. *et al.* Neuronal Parasitism, Early Myenteric Neurons Depopulation and  
650 Continuous Axonal Networking Damage as Underlying Mechanisms of the Experimental  
651 Intestinal Chagas' Disease. *Front Cell Infect Microbiol* **10**, 583899,  
652 doi:10.3389/fcimb.2020.583899 (2020).
- 653 31 Moreira, N. M. *et al.* Physical exercise protects myenteric neurons and reduces parasitemia in  
654 *Trypanosoma cruzi* infection. *Exp Parasitol* **141**, 68-74, doi:10.1016/j.exppara.2014.03.005  
655 (2014).
- 656 32 Oda, J. Y. *et al.* Myenteric neuroprotective role of aspirin in acute and chronic experimental  
657 infections with *Trypanosoma cruzi*. *Neurogastroenterol Motil* **29**, 1-13,  
658 doi:10.1111/nmo.13102 (2017).
- 659 33 de Oliveira, G. M. *et al.* Applicability of the use of charcoal for the evaluation of intestinal  
660 motility in a murine model of *Trypanosoma cruzi* infection. *Parasitology Research* **102**, 747-  
661 750, doi:10.1007/s00436-007-0829-8 (2008).
- 662 34 de Souza, A. P. *et al.* The role of selenium in intestinal motility and morphology in a murine  
663 model of *Typanosoma cruzi* infection. *Parasitology Research* **106**, 1293-1298,  
664 doi:10.1007/s00436-010-1794-1 (2010).
- 665 35 Messenger, L. A., Miles, M. A. & Bern, C. Between a bug and a hard place: *Trypanosoma cruzi*  
666 genetic diversity and the clinical outcomes of Chagas disease. *Expert Rev Anti Infect Ther* **13**,  
667 995-1029, doi:10.1586/14787210.2015.1056158 (2015).
- 668 36 Rassi, A., Jr., Rassi, A. & Marin-Neto, J. A. Chagas disease. *Lancet* **375**, 1388-1402,  
669 doi:10.1016/S0140-6736(10)60061-X (2010).
- 670 37 Köberle, F. The causation and importance of nervous lesions in American trypanosomiasis. *B*  
671 *World Health Organ* **42**, 739-743 (1970).
- 672 38 Boesmans, W., Lasrado, R., Vanden Berghe, P. & Pachnis, V. Heterogeneity and phenotypic  
673 plasticity of glial cells in the mammalian enteric nervous system. *Glia* **63**, 229-241,  
674 doi:10.1002/glia.22746 (2015).
- 675 39 Hossain, E. *et al.* Mapping of host-parasite-microbiome interactions reveals metabolic  
676 determinants of tropism and tolerance in Chagas disease. *Sci Adv* **6**, eaaz2015,  
677 doi:10.1126/sciadv.aaz2015 (2020).
- 678 40 Veiga-Fernandes, H. & Pachnis, V. Neuroimmune regulation during intestinal development  
679 and homeostasis. *Nat Immunol* **18**, 116-122, doi:10.1038/ni.3634 (2017).
- 680 41 Miller, M. S., Galligan, J. J. & Burks, T. F. Accurate measurement of intestinal transit in the rat.  
681 *J Pharmacol Methods* **6**, 211-217, doi:10.1016/0160-5402(81)90110-8 (1981).
- 682 42 Lewis, M. D. *et al.* Imaging the development of chronic Chagas disease after oral  
683 transmission. *Sci Rep* **8**, 11292, doi:10.1038/s41598-018-29564-7 (2018).
- 684 43 Schmittgen, T. D. & Livak, K. J. Analyzing real-time PCR data by the comparative C(T) method.  
685 *Nat Protoc* **3**, 1101-1108, doi:10.1038/nprot.2008.73 (2008).
